# Supplementary material for: Host habitat is the major determinant of the gut microbiome of fish
Source: Microbiome. 2021 Jul 31;9:166. doi: 10.1186/s40168-021-01113-x (PMC8325807; doi:10.1186/s40168-021-01113-x)
Supplement: Supplementary file 6 — Additional file 5. Supplementary Table S4. [file 40168_2021_1113_MOESM6_ESM.xlsx]

## Sheet: blast_out
Supplementary Table S4. Local BLAST search for major aquatic environmental bacterial group (SAR11, SAR86 and SAR116) in fish gut microbiota (>90% sequence identity).
Query id	Subject id	% identity	alignment length	mismatches	gap openings	q. start	q. end	s. start	s. end	e-value	bit score	Relative abundance (%)
SAR11 (Candidatus Pelagibacter ubique HTCC1062)	348153	97.78	361	6	1	21	379	1	361	0	646	0.0022961
SAR116 (Candidatus Puniceispirillum marinum IMCC1322)	170189	90.18	387	38	0	83	469	62	448	8e-132	466	0.00306147
SAR116 (Candidatus Puniceispirillum marinum IMCC1322)	168276	95.71	280	12	0	190	469	171	450	5e-130	460	0.00107151
SAR116 (Candidatus Puniceispirillum marinum IMCC1322)	5419	92.33	326	25	0	144	469	123	448	2e-126	448	0.00260225
SAR116 (Candidatus Puniceispirillum marinum IMCC1322)	4482772	92.64	326	22	2	143	468	123	446	5e-124	440	0.00367376
SAR116 (Candidatus Puniceispirillum marinum IMCC1322)	150175	91.74	327	27	0	142	468	121	447	3e-122	434	0.00183688
SAR116 (Candidatus Puniceispirillum marinum IMCC1322)	544772	91.46	328	28	0	142	469	121	448	2e-120	428	0.00168381
SAR116 (Candidatus Puniceispirillum marinum IMCC1322)	557392	91.44	327	28	0	142	468	121	447	7e-120	426	0.00107151
SAR116 (Candidatus Puniceispirillum marinum IMCC1322)	1115275	91.74	327	26	1	142	468	121	446	7e-120	426	0.000918441
SAR116 (Candidatus Puniceispirillum marinum IMCC1322)	New.ReferenceOTU959	91.46	328	27	1	142	468	125	452	4e-118	420	0.00811289
SAR116 (Candidatus Puniceispirillum marinum IMCC1322)	705063	91.46	328	27	1	142	469	121	447	4e-118	420	0.00443913
SAR116 (Candidatus Puniceispirillum marinum IMCC1322)	3688426	91.46	328	27	1	142	468	133	460	4e-118	420	0.00596987
SAR116 (Candidatus Puniceispirillum marinum IMCC1322)	102924	92.36	301	23	0	168	468	147	447	3e-116	414	0.00137766
SAR116 (Candidatus Puniceispirillum marinum IMCC1322)	1025949	90.85	328	30	0	142	469	121	448	1e-115	412	0.00367376
SAR116 (Candidatus Puniceispirillum marinum IMCC1322)	New.CleanUp.ReferenceOTU3764	90.83	327	30	0	142	468	135	461	4e-115	410	0.0029084
SAR116 (Candidatus Puniceispirillum marinum IMCC1322)	4816	90.85	328	29	1	143	469	124	451	3e-113	404	0.000918441
SAR116 (Candidatus Puniceispirillum marinum IMCC1322)	346740	90.55	328	31	0	142	469	134	461	3e-113	404	0.00734753
SAR116 (Candidatus Puniceispirillum marinum IMCC1322)	New.ReferenceOTU1896	90.83	327	29	1	142	468	123	448	1e-112	402	0.00826597
SAR116 (Candidatus Puniceispirillum marinum IMCC1322)	New.ReferenceOTU1003	90.52	327	31	0	142	468	121	447	1e-112	402	0.00275532
