# Supplementary material for: Host habitat is the major determinant of the gut microbiome of fish
Source: Microbiome. 2021 Jul 31;9:166. doi: 10.1186/s40168-021-01113-x (PMC8325807; doi:10.1186/s40168-021-01113-x)
Supplement: Supplementary file 8 — Additional file 7. Supplementary Table S6. [file 40168_2021_1113_MOESM8_ESM.xlsx]

## Sheet: Sheet1
	Supplementary Table S6. Basic information of collected fishes
	SampleID	Habitat classification	Sampling group	Host taxonomic classifications
				Phylum	Class	Order	Family	Genus	Species
	Andong.L.0.1	FW	Andong Lake	Chordata	Actinopterygii	Perciformes	Centrarchidae	Micropterus	salmoides
	Andong.L.0.2	FW	Andong Lake	Chordata	Actinopterygii	Perciformes	Centrarchidae	Micropterus	salmoides
	Andong.L.0.3	FW	Andong Lake	Chordata	Actinopterygii	Perciformes	Centrarchidae	Lepomis	macrochirus
	Andong.L.0.4	FW	Andong Lake	Chordata	Actinopterygii	Perciformes	Centrarchidae	Lepomis	macrochirus
	Andong.L.0.5	FW	Andong Lake	Chordata	Actinopterygii	Cypriniformes	Cyprinidae	Cyprinus	carpio
	Andong.L.0.6	FW	Andong Lake	Chordata	Actinopterygii	Cypriniformes	Cyprinidae	Hemibarbus	labeo
	Andong.L.0.7	FW	Andong Lake	Chordata	Actinopterygii	Cypriniformes	Cyprinidae	Hemiculter	leucisculus
	Andong.L.0.8	FW	Andong Lake	Chordata	Actinopterygii	Cypriniformes	Cyprinidae	Opsariichthys	uncirostris
	Andong.L.0.9	FW	Andong Lake	Chordata	Actinopterygii	Siluriformes	Bagridae	Tachysurus	fulvidraco
	Andong.L.1.0	FW	Andong Lake	Chordata	Actinopterygii	Cypriniformes	Cyprinidae	Erythroculter	erythropterus
	Andong.L.1.1	FW	Andong Lake	Chordata	Actinopterygii	Siluriformes	Siluridae	Silurus	asotus
	Andong.L.1.2	FW	Andong Lake	Chordata	Actinopterygii	Siluriformes	Bagridae	Tachysurus	ussuriensis
	Andong.L.1.3	FW	Andong Lake	Chordata	Actinopterygii	Siluriformes	Bagridae	Tachysurus	ussuriensis
	Andong.L.1.4	FW	Andong Lake	Chordata	Actinopterygii	Siluriformes	Bagridae	Tachysurus	ussuriensis
	Andong.L.1.5	FW	Andong Lake	Chordata	Actinopterygii	Cypriniformes	Cyprinidae	Hemibarbus	labeo
	Andong.L.1.6	FW	Andong Lake	Chordata	Actinopterygii	Cypriniformes	Cyprinidae	Hemibarbus	labeo
	Andong.L.1.7	FW	Andong Lake	Chordata	Actinopterygii	Cypriniformes	Cyprinidae	Opsariichthys	uncirostris
	Andong.L.1.8	FW	Andong Lake	Chordata	Actinopterygii	Cypriniformes	Cyprinidae	Opsariichthys	uncirostris
	Andong.L.1.9	FW	Andong Lake	Chordata	Actinopterygii	Siluriformes	Bagridae	Tachysurus	fulvidraco
	Andong.L.2.0	FW	Andong Lake	Chordata	Actinopterygii	Siluriformes	Bagridae	Tachysurus	fulvidraco
	Andong.L.2.1	FW	Andong Lake	Chordata	Actinopterygii	Cypriniformes	Cyprinidae	Carassius	auratus
	Andong.L.2.2	FW	Andong Lake	Chordata	Actinopterygii	Cypriniformes	Cyprinidae	Carassius	cuvieri
	Andong.L.2.3	FW	Andong Lake	Chordata	Actinopterygii	Cypriniformes	Cyprinidae	Carassius	cuvieri
	Andong.L.2.5	FW	Andong Lake	Chordata	Actinopterygii	Cypriniformes	Cyprinidae	Erythroculter	erythropterus
	Andong.L.2.6	FW	Andong Lake	Chordata	Actinopterygii	Siluriformes	Siluridae	Silurus	asotus
	Andong.L.2.7	FW	Andong Lake	Chordata	Actinopterygii	Perciformes	Centrarchidae	Micropterus	salmoides
	Andong.L.2.9	FW	Andong Lake	Chordata	Actinopterygii	Perciformes	Centrarchidae	Lepomis	macrochirus
	Andong.L.3.0	FW	Andong Lake	Chordata	Actinopterygii	Cypriniformes	Cyprinidae	Cyprinus	carpio
	Andong.L.3.1	FW	Andong Lake	Chordata	Actinopterygii	Cypriniformes	Cyprinidae	Cyprinus	carpio
	Deep.0.1	SW	East sea (Deep sea)	Chordata	Actinopterygii	Scorpaeniformes	Liparidae	Careproctus	rastrinus
	Deep.0.2	SW	East sea (Deep sea)	Chordata	Actinopterygii	Perciformes	Zoarcidae	Allolepis	hollandi
	Deep.0.3	SW	East sea (Deep sea)	Chordata	Actinopterygii	Scorpaeniformes	Psychrolutidae	Dasycottus	setiger
	Deep.0.4	SW	East sea (Deep sea)	Chordata	Actinopterygii	Scorpaeniformes	Psychrolutidae	Dasycottus	setiger
	Deep.0.5	SW	East sea (Deep sea)	Chordata	Actinopterygii	Scorpaeniformes	Psychrolutidae	Dasycottus	setiger
	Deep.0.6	SW	East sea (Deep sea)	Chordata	Actinopterygii	Perciformes	Zoarcidae	Allolepis	hollandi
	Deep.0.7	SW	East sea (Deep sea)	Chordata	Actinopterygii	Scorpaeniformes	Psychrolutidae	Malacocottus	gibber
	Deep.0.8	SW	East sea (Deep sea)	Chordata	Actinopterygii	Scorpaeniformes	Psychrolutidae	Malacocottus	gibber
	Deep.0.9	SW	East sea (Deep sea)	Chordata	Actinopterygii	Scorpaeniformes	Psychrolutidae	Malacocottus	gibber
	Deep.1.0	SW	East sea (Deep sea)	Chordata	Actinopterygii	Perciformes	Zoarcidae	Allolepis	hollandi
	Deep.1.1	SW	East sea (Deep sea)	Chordata	Actinopterygii	Scorpaeniformes	Liparidae	Careproctus	rastrinus
	Deep.1.2	SW	East sea (Deep sea)	Chordata	Actinopterygii	Scorpaeniformes	Cyclopteridae	Aptocyclus	ventricosus
	Deep.1.3	SW	East sea (Deep sea)	Chordata	Actinopterygii	Scorpaeniformes	Psychrolutidae	Dasycottus	setiger
	Deep.1.4	SW	East sea (Deep sea)	Chordata	Actinopterygii	Scorpaeniformes	Psychrolutidae	Dasycottus	setiger
	Deep.1.5	SW	East sea (Deep sea)	Chordata	Actinopterygii	Scorpaeniformes	Psychrolutidae	Malacocottus	gibber
	Deep.1.6	SW	East sea (Deep sea)	Chordata	Actinopterygii	Perciformes	Zoarcidae	Allolepis	hollandi
	Deep.1.7	SW	East sea (Deep sea)	Chordata	Actinopterygii	Perciformes	Zoarcidae	Allolepis	hollandi
	Deep.1.8	SW	East sea (Deep sea)	Chordata	Actinopterygii	Scorpaeniformes	Liparidae	Careproctus	rastrinus
	Deep.1.9	SW	East sea (Deep sea)	Chordata	Actinopterygii	Perciformes	Zoarcidae	Allolepis	hollandi
	Deep.2.0	SW	East sea (Deep sea)	Chordata	Actinopterygii	Perciformes	Zoarcidae	Allolepis	hollandi
	Deep.2.1	SW	East sea (Deep sea)	Chordata	Actinopterygii	Scorpaeniformes	Liparidae	Careproctus	rastrinus
	Deep.2.2	SW	East sea (Deep sea)	Chordata	Actinopterygii	Scorpaeniformes	Liparidae	Careproctus	rastrinus
	Deep.2.3	SW	East sea (Deep sea)	Chordata	Actinopterygii	Scorpaeniformes	Cyclopteridae	Aptocyclus	ventricosus
	Deep.2.4	SW	East sea (Deep sea)	Chordata	Actinopterygii	Scorpaeniformes	Scorpaenidae	Sebastes	owstoni
	Deep.2.5	SW	East sea (Deep sea)	Chordata	Actinopterygii	Gadiformes	Gadidae	Gadus	macrocephalus
	Deep.2.6	SW	East sea (Deep sea)	Chordata	Actinopterygii	Gadiformes	Gadidae	Gadus	macrocephalus
	Deep.2.7	SW	East sea (Deep sea)	Chordata	Actinopterygii	Pleuronectiformes	Pleuronectidae	Glyptocephalus	stelleri
	Deep.2.8	SW	East sea (Deep sea)	Chordata	Actinopterygii	Pleuronectiformes	Pleuronectidae	Glyptocephalus	stelleri
	Deep.2.9	SW	East sea (Deep sea)	Chordata	Actinopterygii	Pleuronectiformes	Pleuronectidae	Hippoglossoides	dubius
	Deep.3.0	SW	East sea (Deep sea)	Chordata	Actinopterygii	Pleuronectiformes	Pleuronectidae	Hippoglossoides	dubius
	Deep.3.1	SW	East sea (Deep sea)	Chordata	Actinopterygii	Perciformes	Zoarcidae	Lycodes	nakamurae
	Deep.3.2	SW	East sea (Deep sea)	Chordata	Actinopterygii	Scorpaeniformes	Psychrolutidae	Dasycottus	setiger
	Deep.3.3	SW	East sea (Deep sea)	Chordata	Actinopterygii	Scorpaeniformes	Psychrolutidae	Dasycottus	setiger
	Deep.3.4	SW	East sea (Deep sea)	Chordata	Actinopterygii	Perciformes	Trichodontidae	Arctoscopus	japonicus
	Deep.3.5	SW	East sea (Deep sea)	Chordata	Actinopterygii	Perciformes	Trichodontidae	Arctoscopus	japonicus
	Deep.3.6	SW	East sea (Deep sea)	Chordata	Actinopterygii	Scorpaeniformes	Cyclopteridae	Eumicrotremus	birulai
	Deep.3.7	SW	East sea (Deep sea)	Chordata	Actinopterygii	Perciformes	Zoarcidae	Petroschmidtia	toyamensis
	Deep.3.8	SW	East sea (Deep sea)	Chordata	Actinopterygii	Perciformes	Zoarcidae	Petroschmidtia	toyamensis
	Deep.3.9	SW	East sea (Deep sea)	Chordata	Actinopterygii	Scorpaeniformes	Psychrolutidae	Dasycottus	setiger
	Deep.4.0	SW	East sea (Deep sea)	Chordata	Actinopterygii	Perciformes	Zoarcidae	Allolepis	hollandi
	Deep.4.1	SW	East sea (Deep sea)	Chordata	Actinopterygii	Perciformes	Zoarcidae	Allolepis	hollandi
	Deep.4.2	SW	East sea (Deep sea)	Chordata	Actinopterygii	Perciformes	Zoarcidae	Allolepis	hollandi
	Deep.4.3	SW	East sea (Deep sea)	Chordata	Actinopterygii	Perciformes	Zoarcidae	Allolepis	hollandi
	Deep.4.4	SW	East sea (Deep sea)	Chordata	Actinopterygii	Perciformes	Zoarcidae	Allolepis	hollandi
	Deep.4.5	SW	East sea (Deep sea)	Chordata	Actinopterygii	Scorpaeniformes	Psychrolutidae	Malacocottus	gibber
	Deep.4.6	SW	East sea (Deep sea)	Chordata	Actinopterygii	Scorpaeniformes	Psychrolutidae	Malacocottus	gibber
	Deep.4.7	SW	East sea (Deep sea)	Chordata	Actinopterygii	Scorpaeniformes	Psychrolutidae	Malacocottus	gibber
	Deep.4.8	SW	East sea (Deep sea)	Chordata	Actinopterygii	Perciformes	Zoarcidae	Petroschmidtia	toyamensis
	Deep.4.9	SW	East sea (Deep sea)	Chordata	Actinopterygii	Scorpaeniformes	Liparidae	Careproctus	rastrinus
	Deep.5.0	SW	East sea (Deep sea)	Chordata	Actinopterygii	Scorpaeniformes	Psychrolutidae	Malacocottus	gibber
	Deep.5.1	SW	East sea (Deep sea)	Chordata	Actinopterygii	Scorpaeniformes	Psychrolutidae	Malacocottus	gibber
	Deep.5.2	SW	East sea (Deep sea)	Chordata	Actinopterygii	Scorpaeniformes	Psychrolutidae	Malacocottus	gibber
	Deep.5.3	SW	East sea (Deep sea)	Chordata	Actinopterygii	Scorpaeniformes	Psychrolutidae	Malacocottus	gibber
	Deep.5.4	SW	East sea (Deep sea)	Chordata	Actinopterygii	Scorpaeniformes	Psychrolutidae	Dasycottus	setiger
	Deep.5.5	SW	East sea (Deep sea)	Chordata	Actinopterygii	Scorpaeniformes	Psychrolutidae	Dasycottus	setiger
	Deep.5.6	SW	East sea (Deep sea)	Chordata	Actinopterygii	Scorpaeniformes	Psychrolutidae	Dasycottus	setiger
	Deep.5.7	SW	East sea (Deep sea)	Chordata	Actinopterygii	Scorpaeniformes	Psychrolutidae	Dasycottus	setiger
	Deep.5.8	SW	East sea (Deep sea)	Chordata	Actinopterygii	Scorpaeniformes	Psychrolutidae	Dasycottus	setiger
	Deep.5.9	SW	East sea (Deep sea)	Chordata	Actinopterygii	Perciformes	Zoarcidae	Allolepis	hollandi
	Deep.6.0	SW	East sea (Deep sea)	Chordata	Actinopterygii	Scorpaeniformes	Liparidae	Careproctus	rastrinus
	Deep.6.1	SW	East sea (Deep sea)	Chordata	Actinopterygii	Scorpaeniformes	Liparidae	Careproctus	rastrinus
	Deep.6.2	SW	East sea (Deep sea)	Chordata	Actinopterygii	Scorpaeniformes	Liparidae	Liparis	ochotensis
	Deep.6.3	SW	East sea (Deep sea)	Chordata	Actinopterygii	Perciformes	Zoarcidae	Petroschmidtia	toyamensis
	Deep.6.4	SW	East sea (Deep sea)	Chordata	Actinopterygii	Scorpaeniformes	Liparidae	Liparis	tessellatus
	Deep.6.5	SW	East sea (Deep sea)	Chordata	Actinopterygii	Perciformes	Trichodontidae	Arctoscopus	japonicus
	Deep.6.6	SW	East sea (Deep sea)	Chordata	Actinopterygii	Perciformes	Trichodontidae	Arctoscopus	japonicus
	Deep.6.7	SW	East sea (Deep sea)	Chordata	Actinopterygii	Perciformes	Stichaeidae	Lumpenella	longirostris
	Deep.6.9	SW	East sea (Deep sea)	Chordata	Actinopterygii	Perciformes	Zoarcidae	Allolepis	hollandi
	East.D.0.1	SW	East sea (Dokdo)	Chordata	Actinopterygii	Lampridiformes	Trachipteridae	Zu	cristatus
	East.D.0.2	SW	East sea (Dokdo)	Chordata	Actinopterygii	Scorpaeniformes	Scorpaenidae	Sebastes	inermis
	East.D.0.3	SW	East sea (Dokdo)	Chordata	Actinopterygii	Perciformes	Labridae	Halichoeres	poecilopterus
	East.D.0.4	SW	East sea (Dokdo)	Chordata	Actinopterygii	Perciformes	Labridae	Pseudolabrus	japonicus
	East.D.0.5	SW	East sea (Dokdo)	Chordata	Actinopterygii	Perciformes	Carangidae	Seriola	lalandi
	East.D.0.6	SW	East sea (Dokdo)	Chordata	Actinopterygii	Perciformes	Cheilodactylidae	Goniistius	zonatus
	East.D.0.8	SW	East sea (Dokdo)	Chordata	Actinopterygii	Scorpaeniformes	Hexagrammidae	Hexagrammos	otakii
	East.D.0.9	SW	East sea (Dokdo)	Chordata	Actinopterygii	Scorpaeniformes	Hexagrammidae	Hexagrammos	otakii
	East.D.1.0	SW	East sea (Dokdo)	Chordata	Actinopterygii	Scorpaeniformes	Scorpaenidae	Sebastes	pachycephalus
	East.D.1.1	SW	East sea (Dokdo)	Chordata	Actinopterygii	Scorpaeniformes	Scorpaenidae	Sebastes	hubbsi
	East.D.1.2	SW	East sea (Dokdo)	Chordata	Actinopterygii	Scorpaeniformes	Scorpaenidae	Sebastes	pachycephalus
	East.D.1.5	SW	East sea (Dokdo)	Chordata	Actinopterygii	Tetraodontiformes	Monacanthidae	Thamnaconus	modestus
	East.D.1.6	SW	East sea (Dokdo)	Chordata	Actinopterygii	Perciformes	Labridae	Pseudolabrus	japonicus
	East.D.1.8	SW	East sea (Dokdo)	Chordata	Actinopterygii	Perciformes	Carangidae	Seriola	quinqueradiata
	East.D.1.9	SW	East sea (Dokdo)	Chordata	Actinopterygii	Scorpaeniformes	Scorpaenidae	Sebastes	inermis
	East.D.2.0	SW	East sea (Dokdo)	Chordata	Actinopterygii	Scorpaeniformes	Scorpaenidae	Sebastes	vulpes
	East.D.2.1	SW	East sea (Dokdo)	Chordata	Actinopterygii	Scorpaeniformes	Hexagrammidae	Hexagrammos?	agrammus
	East.D.2.2	SW	East sea (Dokdo)	Chordata	Actinopterygii	Scorpaeniformes	Scorpaenidae	Sebastes	thompsoni
	East.D.2.3	SW	East sea (Dokdo)	Chordata	Actinopterygii	Tetraodontiformes	Monacanthidae	Thamnaconus	modestus
	East.D.2.4	SW	East sea (Dokdo)	Chordata	Actinopterygii	Tetraodontiformes	Monacanthidae	Thamnaconus	modestus
	East.D.2.5	SW	East sea (Dokdo)	Chordata	Actinopterygii	Scorpaeniformes	Scorpaenidae	Sebastes	thompsoni
	East.D.2.6	SW	East sea (Dokdo)	Chordata	Actinopterygii	Scorpaeniformes	Scorpaenidae	Sebastes	thompsoni
	East.D.2.7	SW	East sea (Dokdo)	Chordata	Actinopterygii	Perciformes	Labridae	Semicossyphus	reticulatus
	East.D.2.8	SW	East sea (Dokdo)	Chordata	Actinopterygii	Perciformes	Kyphosidae	Girella	punctata
	East.D.2.9	SW	East sea (Dokdo)	Chordata	Actinopterygii	Perciformes	Trichodontidae	Arctoscopus	japonicus
	East.D.3.0	SW	East sea (Dokdo)	Chordata	Actinopterygii	Perciformes	Trichodontidae	Arctoscopus	japonicus
	East.D.3.1	SW	East sea (Dokdo)	Chordata	Actinopterygii	Perciformes	Trichodontidae	Arctoscopus	japonicus
	East.D.3.2	SW	East sea (Dokdo)	Chordata	Actinopterygii	Perciformes	Trichodontidae	Arctoscopus	japonicus
	KN.S.0.1	FW	Gangneung (Yeongok Stream)	Chordata	Actinopterygii	Cypriniformes	Cobitidae	Cobitis	melanoleuca
	KN.S.0.2	FW	Gangneung (Yeongok Stream)	Chordata	Actinopterygii	Perciformes	Gobiidae	Tridentiger	brevispinis
	KN.S.0.3	FW	Gangneung (Yeongok Stream)	Chordata	Actinopterygii	Perciformes	Gobiidae	Gymnogobius	urotaenia
	KN.S.0.4	FW	Gangneung (Yeongok Stream)	Chordata	Actinopterygii	Cypriniformes	Cyprinidae	Coreoleuciscus	splendidus
	KN.S.0.5	FW	Gangneung (Yeongok Stream)	Chordata	Actinopterygii	Cypriniformes	Cyprinidae	Coreoleuciscus	splendidus
	KN.S.0.6	FW	Gangneung (Yeongok Stream)	Chordata	Actinopterygii	Cypriniformes	Cobitidae	Koreocobitis	rotundicaudata
	KN.S.0.7	FW	Gangneung (Yeongok Stream)	Chordata	Actinopterygii	Cypriniformes	Cyprinidae	Pungtungia	herzi
	KN.S.0.8	FW	Gangneung (Yeongok Stream)	Chordata	Actinopterygii	Cypriniformes	Balitoridae	Nemacheilus	toni
	KN.S.0.9	FW	Gangneung (Yeongok Stream)	Chordata	Actinopterygii	Perciformes	Gobiidae	Gymnogobius	urotaenia
	KN.S.1.1	FW	Gangneung (Yeongok Stream)	Chordata	Actinopterygii	Cypriniformes	Cyprinidae	Pungtungia	herzi
	KN.S.1.2	FW	Gangneung (Yeongok Stream)	Chordata	Actinopterygii	Cypriniformes	Cyprinidae	Pungtungia	herzi
	KN.S.1.3	FW	Gangneung (Yeongok Stream)	Chordata	Actinopterygii	Cypriniformes	Cobitidae	Cobitis	melanoleuca
	KN.S.1.4	FW	Gangneung (Yeongok Stream)	Chordata	Actinopterygii	Cypriniformes	Cyprinidae	Zacco	platypus
	KN.S.1.5	FW	Gangneung (Yeongok Stream)	Chordata	Actinopterygii	Cypriniformes	Cyprinidae	Zacco	platypus
	KN.S.1.6	FW	Gangneung (Yeongok Stream)	Chordata	Actinopterygii	Perciformes	Gobiidae	Tridentiger	brevispinis
	KN.S.1.7	FW	Gangneung (Yeongok Stream)	Chordata	Actinopterygii	Osmeriformes	Osmeridae	Plecoglossus	altivelis
	West.0.1	SW	West sea (EEZ)	Chordata	Actinopterygii	Perciformes	Scombridae	Scomberomorus	niphonius
	West.0.2	SW	West sea (EEZ)	Chordata	Actinopterygii	Tetraodontiformes	Tetraodontidae	Takifugu	chinensis
	West.0.3	SW	West sea (EEZ)	Chordata	Actinopterygii	Gadiformes	Gadidae	Gadus	macrocephalus
	West.0.4	SW	West sea (EEZ)	Chordata	Actinopterygii	Gadiformes	Gadidae	Gadus	macrocephalus
	West.0.5	SW	West sea (EEZ)	Chordata	Actinopterygii	Pleuronectiformes	Pleuronectidae	Eopsetta	grigorjewi
	West.0.6	SW	West sea (EEZ)	Chordata	Actinopterygii	Scorpaeniformes	Hemitripteridae	Hemitripterus	villosus
	West.0.7	SW	West sea (EEZ)	Chordata	Actinopterygii	Perciformes	Stichaeidae	Chirolophis	wui
	West.0.8	SW	West sea (EEZ)	Chordata	Chondrichthyes	Rajiformes	Rajidae	Raja	pulchra
	West.0.9	SW	West sea (EEZ)	Chordata	Chondrichthyes	Rajiformes	Rajidae	Raja	pulchra
	West.1.0	SW	West sea (EEZ)	Chordata	Actinopterygii	Scorpaeniformes	Liparidae	Liparis	tanakai
	West.1.1	SW	West sea (EEZ)	Chordata	Actinopterygii	Perciformes	Ammodytidae	Ammodytes	personatus
	West.1.2	SW	West sea (EEZ)	Chordata	Actinopterygii	Perciformes	Sciaenidae	Larimichthys	polyactis
	West.1.3	SW	West sea (EEZ)	Chordata	Actinopterygii	Perciformes	Trichiuridae	Trichiurus	lepturus
	West.1.4	SW	West sea (EEZ)	Chordata	Actinopterygii	Lophiiformes	Lophiidae	Lophius	litulon
	West.1.5	SW	West sea (EEZ)	Chordata	Actinopterygii	Perciformes	Sparidae	Pagrus	major
	West.1.6	SW	West sea (EEZ)	Chordata	Actinopterygii	Perciformes	Sciaenidae	Miichthys	miiuy
	West.1.7	SW	West sea (EEZ)	Chordata	Chondrichthyes	Squaliformes	Squalidae	Squalus	acanthias
	West.1.8	SW	West sea (EEZ)	Chordata	Actinopterygii	Perciformes	Carangidae	Trachurus	japonicus
	West.1.9	SW	West sea (EEZ)	Chordata	Actinopterygii	Perciformes	Sciaenidae	Larimichthys	polyactis
	West.2.0	SW	West sea (EEZ)	Chordata	Actinopterygii	Perciformes	Sciaenidae	Larimichthys	polyactis
	West.2.1	SW	West sea (EEZ)	Chordata	Actinopterygii	Perciformes	Sciaenidae	Collichthys	niveatus
	West.2.2	SW	West sea (EEZ)	Chordata	Actinopterygii	Perciformes	Sciaenidae	Collichthys	niveatus
	West.2.3	SW	West sea (EEZ)	Chordata	Actinopterygii	Perciformes	Acropomatidae	Acropoma	japonicum
	West.2.4	SW	West sea (EEZ)	Chordata	Actinopterygii	Perciformes	Sphyraenidae	Sphyraena	pinguis
	West.2.5	SW	West sea (EEZ)	Chordata	Actinopterygii	Clupeiformes	Engraulidae	Setipinna	tenuifilis
	West.2.6	SW	West sea (EEZ)	Chordata	Actinopterygii	Anguilliformes	Congridae	Conger	myriaster
	West.2.7	SW	West sea (EEZ)	Chordata	Actinopterygii	Perciformes	Sciaenidae	Larimichthys	crocea
	West.2.8	SW	West sea (EEZ)	Chordata	Actinopterygii	Perciformes	Sphyraenidae	Sphyraena	pinguis
	West.2.9	SW	West sea (EEZ)	Chordata	Actinopterygii	Perciformes	Sphyraenidae	Sphyraena	pinguis
	West.3.0	SW	West sea (EEZ)	Chordata	Actinopterygii	Clupeiformes	Engraulidae	Engraulis	japonicus
	West.3.1	SW	West sea (EEZ)	Chordata	Actinopterygii	Scorpaeniformes	Hemitripteridae	Hemitripterus	villosus
	West.3.2	SW	West sea (EEZ)	Chordata	Actinopterygii	Perciformes	Sparidae	Pagrus	major
	West.3.3	SW	West sea (EEZ)	Chordata	Actinopterygii	Perciformes	Sparidae	Pagrus	major
	West.3.4	SW	West sea (EEZ)	Chordata	Actinopterygii	Perciformes	Scombridae	Scomber	japonicus
	West.3.5	SW	West sea (EEZ)	Chordata	Actinopterygii	Perciformes	Scombridae	Scomber	japonicus
	West.3.7	SW	West sea (EEZ)	Chordata	Actinopterygii	Scorpaeniformes	Hemitripteridae	Hemitripterus	villosus
	West.3.8	SW	West sea (EEZ)	Chordata	Actinopterygii	Perciformes	Sciaenidae	Larimichthys	polyactis
	West.3.9	SW	West sea (EEZ)	Chordata	Actinopterygii	Perciformes	Sciaenidae	Larimichthys	polyactis
	West.4.0	SW	West sea (EEZ)	Chordata	Actinopterygii	Perciformes	Sciaenidae	Collichthys	niveatus
	West.4.1	SW	West sea (EEZ)	Chordata	Actinopterygii	Perciformes	Sciaenidae	Collichthys	niveatus
	West.4.2	SW	West sea (EEZ)	Chordata	Actinopterygii	Perciformes	Sciaenidae	Collichthys	niveatus
	West.4.4	SW	West sea (EEZ)	Chordata	Actinopterygii	Perciformes	Sphyraenidae	Sphyraena	pinguis
	West.4.6	SW	West sea (EEZ)	Chordata	Actinopterygii	Clupeiformes	Engraulidae	Setipinna	tenuifilis
	West.4.7	SW	West sea (EEZ)	Chordata	Actinopterygii	Clupeiformes	Engraulidae	Setipinna	tenuifilis
	West.4.8	SW	West sea (EEZ)	Chordata	Chondrichthyes	Rajiformes	Rajidae	Raja	pulchra
	West.4.9	SW	West sea (EEZ)	Chordata	Chondrichthyes	Rajiformes	Rajidae	Raja	pulchra
	West.5.0	SW	West sea (EEZ)	Chordata	Chondrichthyes	Rajiformes	Rajidae	Raja	pulchra
	West.5.1	SW	West sea (EEZ)	Chordata	Actinopterygii	Gadiformes	Gadidae	Gadus	macrocephalus
	West.5.2	SW	West sea (EEZ)	Chordata	Actinopterygii	Perciformes	Zoarcidae	Zoarces	gillii
	West.5.3	SW	West sea (EEZ)	Chordata	Actinopterygii	Pleuronectiformes	Paralichthyidae	Paralichthys	olivaceus
	West.5.4	SW	West sea (EEZ)	Chordata	Actinopterygii	Pleuronectiformes	Pleuronectidae	Kareius	bicoloratus
	West.5.5	SW	West sea (EEZ)	Chordata	Chondrichthyes	Rajiformes	Rajidae	Raja	pulchra
	West.5.6	SW	West sea (EEZ)	Chordata	Chondrichthyes	Rajiformes	Rajidae	Raja	pulchra
	West.5.7	SW	West sea (EEZ)	Chordata	Chondrichthyes	Rajiformes	Rajidae	Raja	pulchra
	West.5.8	SW	West sea (EEZ)	Chordata	Actinopterygii	Perciformes	Sciaenidae	Johnius	grypotus
	West.5.9	SW	West sea (EEZ)	Chordata	Actinopterygii	Scorpaeniformes	Triglidae	Chelidonichthys	spinosus
	West.6.0	SW	West sea (EEZ)	Chordata	Actinopterygii	Perciformes	Sparidae	Pagrus	major
	West.6.1	SW	West sea (EEZ)	Chordata	Actinopterygii	Perciformes	Sparidae	Pagrus	major
	West.6.2	SW	West sea (EEZ)	Chordata	Actinopterygii	Scorpaeniformes	Triglidae	Chelidonichthys	spinosus
	West.6.3	SW	West sea (EEZ)	Chordata	Actinopterygii	Scorpaeniformes	Triglidae	Chelidonichthys	spinosus
	West.6.4	SW	West sea (EEZ)	Chordata	Actinopterygii	Perciformes	Sciaenidae	Nibea	albiflora
	West.6.5	SW	West sea (EEZ)	Chordata	Actinopterygii	Perciformes	Sciaenidae	Nibea	albiflora
	West.6.6	SW	West sea (EEZ)	Chordata	Actinopterygii	Perciformes	Sciaenidae	Nibea	albiflora
	West.6.7	SW	West sea (EEZ)	Chordata	Actinopterygii	Perciformes	Sphyraenidae	Sphyraena	pinguis
	West.6.8	SW	West sea (EEZ)	Chordata	Actinopterygii	Perciformes	Stromateidae	Pampus	echinogaster
	West.6.9	SW	West sea (EEZ)	Chordata	Actinopterygii	Perciformes	Sphyraenidae	Sphyraena	pinguis
	West.7.0	SW	West sea (EEZ)	Chordata	Actinopterygii	Perciformes	Sciaenidae	Larimichthys	polyactis
	West.7.1	SW	West sea (EEZ)	Chordata	Actinopterygii	Perciformes	Sciaenidae	Miichthys	miiuy
	West.7.4	SW	West sea (EEZ)	Chordata	Actinopterygii	Perciformes	Zoarcidae	Zoarces	gillii
	West.7.5	SW	West sea (EEZ)	Chordata	Actinopterygii	Clupeiformes	Engraulidae	Engraulis	japonicus
	YD.L.0.1	FW	Yesan (Yedang Lake)	Chordata	Actinopterygii	Osmeriformes	Osmeridae	Hypomesus	nipponensis
	YD.L.0.2	FW	Yesan (Yedang Lake)	Chordata	Actinopterygii	Cypriniformes	Cyprinidae	Zacco	platypus
	YD.L.0.3	FW	Yesan (Yedang Lake)	Chordata	Actinopterygii	Cypriniformes	Cyprinidae	Hemiculter	leucisculus
	YD.L.0.4	FW	Yesan (Yedang Lake)	Chordata	Actinopterygii	Perciformes	Centrarchidae	Micropterus	salmoides
	YD.L.0.5	FW	Yesan (Yedang Lake)	Chordata	Actinopterygii	Perciformes	Centrarchidae	Micropterus	salmoides
	YD.L.0.6	FW	Yesan (Yedang Lake)	Chordata	Actinopterygii	Cypriniformes	Cyprinidae	Carassius	auratus
	YD.L.0.7	FW	Yesan (Yedang Lake)	Chordata	Actinopterygii	Cypriniformes	Cyprinidae	Pseudorasbora	parva
	YD.L.0.8	FW	Yesan (Yedang Lake)	Chordata	Actinopterygii	Osmeriformes	Osmeridae	Hypomesus	nipponensis
	YD.L.0.9	FW	Yesan (Yedang Lake)	Chordata	Actinopterygii	Osmeriformes	Osmeridae	Hypomesus	nipponensis
	YD.L.1.0	FW	Yesan (Yedang Lake)	Chordata	Actinopterygii	Cypriniformes	Cyprinidae	Zacco	platypus
	YD.L.1.1	FW	Yesan (Yedang Lake)	Chordata	Actinopterygii	Cypriniformes	Cyprinidae	Zacco	platypus
	YD.L.1.2	FW	Yesan (Yedang Lake)	Chordata	Actinopterygii	Perciformes	Centrarchidae	Micropterus	salmoides
	YD.L.1.3	FW	Yesan (Yedang Lake)	Chordata	Actinopterygii	Cypriniformes	Cyprinidae	Carassius	cuvieri
	YD.L.1.4	FW	Yesan (Yedang Lake)	Chordata	Actinopterygii	Cypriniformes	Cyprinidae	Carassius	cuvieri
	YD.L.1.5	FW	Yesan (Yedang Lake)	Chordata	Actinopterygii	Cypriniformes	Cyprinidae	Pseudorasbora	parva
	YD.L.1.6	FW	Yesan (Yedang Lake)	Chordata	Actinopterygii	Cypriniformes	Cyprinidae	Pseudorasbora	parva
	EEZ, exclusive economic zone; FW, freshwater; SW, seawater.
